# Supplementary material for: The Lifetime of Nitrogen Oxides in an Isoprene Dominated Forest
Source: Copernicus journal article supplement (doi:10.5194/acp-2016-28), 2016-01-21
Supplement: Supplementary file [file acp-2016-28-AC2-supplement.pdf]

## Response to Reviewer 2

**We thank the reviewer for the helpful comments.**

### **Reviewer 2**

*Chemical formulas (HNO<sub>3</sub>, RONO<sub>2</sub>, etc.) are used before they are defined but then defined upon a second use. Either don't define them (assume everyone reading the paper already knows) or define them upon first use.*

We have gone through the manuscript to be consistent in our definitions of chemical formulas. We assume the reader is familiar with simple chemical formulas (e.g. O<sub>3</sub>, HNO<sub>3</sub>), but include definitions of classes of compounds that have multiple abbreviations (e.g. ΣANs/ ΣRONO<sub>2</sub>)

*Should reaction R3 be shown as reversible as the decomposition can be described using a thermal equilibrium.*

We have changed reaction R3 to be reversible

*Page 4, line 17. Perhaps it would be better to not use primary (as it can connote direct emission), maybe use predominant?*

We have changed this sentence to avoid the word primary:

“This is especially true for the multifunctional, biogenically-derived nitrates that are the predominant component of ΣANs in forested areas (e.g. Beaver et al., 2012).”

*Figure 1 – Please distinguish more strongly between NO<sub>3</sub><sup>-</sup> (nitrate ion) and NO<sub>3</sub>· (nitrate radical) as the dash looks like a dot.*

We have made the dash in Figure 1 significantly larger to make this clearer.

*Equation 2 – Is the fraction flipped? Should it not be deposition velocity\*concentration/BLH?*

We thank the reviewer for noticing this error. We have corrected this equation to read as:

$$L(\text{HNO}_3) = \frac{v_{\text{dep}}}{\text{BLH}} \cdot [\text{HNO}_3]$$

*Page 8, first paragraph. . . are there any other potential ignored or unidentified HNO<sub>3</sub> sources that should at least be mentioned?*

While there are other possible sources of nitric acid, these sources would affect only the

budget of nitric acid and not alkyl nitrates. We have added a statement about these other possible sources to the end of Section 4.1:

“If other processes are responsible for the missing nitric acid source, these would not affect the budget of  $\Sigma$ ANs. Only the conversion of  $\Sigma$ ANs to nitric acid will lead to a missing source of nitric acid and a missing sink of  $\Sigma$ ANs.”

*Figure 7 – Is photolysis not included because it is assumed to occur so rapidly that it is “included” in the OH reaction*

This is correct. We have revised the text to clarify this point:

“Since isoprene hydroxy-nitrates and most other first-generation nitrates must be further oxidized before undergoing photolysis, we do not include photolysis as a separate loss process in Fig. 7. Nitrates produced in the oxidation of compounds such as MVK and MACR can undergo photolysis without reacting with OH first, but these are a minor fraction of the total  $\Sigma$ AN production rate (Fig. 5).”
